# Supplementary material for: Essential Domains ofSchizosaccharomyces pombeRad8 Required for DNA Damage Response
Source: Oxford University Press journal article supplement (doi:10.1534/g3.114.011346), 2014-05-30
Supplement: 011346_011346si.pdf [file 011346_011346si.pdf]

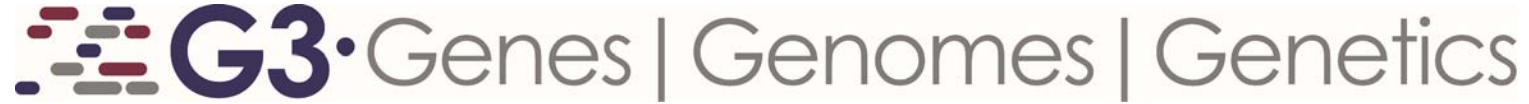

## Essential domains of *S. pombe* Rad8 required for DNA damage response

Lin Ding\* and Susan L Forsburg\*

\*Program in Molecular & Computational Biology, University of Southern California  
Los Angeles, CA 90089-2910

Corresponding Author: Susan L Forsburg

Address: Program in Molecular & Computational Biology, University of Southern California, 1050 Childs Way, Los Angeles, CA 90089-2910  
Phone 213-740-7342  
Email: [forsburg@usc.edu](mailto:forsburg@usc.edu)

**DOI: 10.1534/g3.114.011346**

**Table S1 Yeast strains used in this study**

| Strain number | Genotype                                                                        | Source                     |
|---------------|---------------------------------------------------------------------------------|----------------------------|
| FY11          | <i>h- ade6-M210</i>                                                             | Our stock                  |
| FY528         | <i>h+ his3-D1 ura4-D18 leu1-32 ade6-M210</i>                                    | Our stock                  |
| FY527         | <i>h- his3-D1 ura4-D18 leu1-32 ade6-M216</i>                                    | Our stock                  |
| FY5627        | <i>h- Δrad8::hphMX his3-D1 ura4-D18 leu1-32 ade6-M210</i>                       | This study                 |
| FY5698        | <i>h- Δrad8::hphMX his3-D1 ura4-D18 leu1-32 ade6-M210</i>                       | This study                 |
| FY5625        | <i>h+ Δrad8::hphMX his3-D1 ura4-D18 leu1-32 ade6-M216</i>                       | This study                 |
| FY5699        | <i>h+ Δrad8::hphMX his3-D1 ura4-D18 leu1-32 ade6-M210</i>                       | This study                 |
| FY444         | <i>h+ rad8-190 ura4-D18 leu1-32 ade6-704</i>                                    | Our stock                  |
| FY1884        | <i>h- smt-0 Δrad51::ura4+ ura4-D18 leu1-32 ade6-M210</i>                        | Our stock                  |
| FY6785        | <i>h- smt-0 Δrad51::ura4+ Δrad8::hphMX ura4-D18 leu1-32 ade6-M210</i>           | This study                 |
| FY1866        | <i>h- smt-0 Δrad54::ura4+ ura4-D18 leu1-32 ade6-M216</i>                        | Our stock                  |
| FY6868        | <i>h- smt-0 Δrad54::ura4+ Δrad8::hphMX ura4-D18 leu1-32 ade6-M216</i>           | This study                 |
| FY1389        | <i>h- smt-0 Δrad55::ura4+ ura4-D18</i>                                          | Our stock                  |
| FY6809        | <i>h- smt-0 Δrad55::ura4+ Δrad8::hphMX ura4-D18 ade6-M216</i>                   | This study                 |
| FY3770        | <i>h- smt-0 Δrad57::ura4+ his3-D1 ura4-D18 leu1-32 ade6-M210</i>                | Our stock                  |
| FY6790        | <i>h- smt-0 Δrad57::ura4+ Δrad8::hphMX his3-D1 ura4-D18 leu1-32 ade6-M210</i>   | This study                 |
| FY6397        | <i>h- loxP-dna2-K961T-loxM3 ura4-D18 leu1-32 ade6-704</i>                       | AW525<br>(Hu et al., 2012) |
| FY6428        | <i>h- loxP-dna2-K961T-loxM3 Δrad8::hphMX his3-D1 ura4-D18 leu1-32 ade6-M216</i> | This study                 |
| FY6452        | <i>h- dna2ts:ura4 ura4-D18</i>                                                  | This study                 |
| FY6505        | <i>h- dna2ts:ura4 Δrad8::hphMX his3-D1 ura4-D18 ade6-M216</i>                   | (Hu et al., 2012)          |
| FY254         | <i>h- ura4-D18 leu1-32 ade6-M210 can1-1</i>                                     | This study                 |
| FY6314        | <i>h- loxP-rad8*-loxM3 ura4-D18 leu1-32 ade6-M210 can1-1</i>                    | Our stock                  |
| FY6322        | <i>h- loxP-Δrad8-loxM3 ura4-D18 leu1-32 ade6-M210 can1-1</i>                    | This study                 |
| FY6316        | <i>h- loxP-rad8-ΔHIRAN-loxM3 ura4-D18 leu1-32 ade6-M210 can1-1</i>              | This study                 |
| FY6514        | <i>h- loxP-rad8ΔHIRAN::SV40NLS-loxM3 ura4-D18 leu1-32 ade6-M210 can1-1</i>      | This study                 |
| FY6516        | <i>h- loxP-rad8ΔHIRAN::rad8NLS-loxM3 ura4-D18 leu1-32 ade6-M210 can1-1</i>      | This study                 |
| FY6518        | <i>h- loxP-rad8-ΔNLS-loxM3 ura4-D18 leu1-32 ade6-M210 can1-1</i>                | This study                 |
| FY6520        | <i>h- loxP-rad8-HIRAN-loxM3 ura4-D18 leu1-32 ade6-M210 can1-1</i>               | This study                 |
| FY6318        | <i>h- loxP-rad8-K535AT536A-loxM3 leu1-32 ade6-M210 can1-1</i>                   | This study                 |
| FY6320        | <i>h- loxP-rad8-I879A-loxM3 ura4-D18 leu1-32 ade6-M210 can1-1</i>               | This study                 |
| FY6284        | <i>h- loxP-rad8-K535AT536AI879A-loxM3 ura4-D18 leu1-32 ade6-M210 can1-1</i>     | This study                 |
| FY7012        | <i>h- loxP-rad8*-5FLAG::KanMX6 ura4-D18 leu1-32 ade6-M210 can1-1</i>            | This study                 |
| FY6905        | <i>h- loxP-rad8-K535AT536A-5FLAG::KanMX6 ura4-D18 leu1-32 ade6-M210 can1-1</i>  | This study                 |

|        |                                                                                                             |              |
|--------|-------------------------------------------------------------------------------------------------------------|--------------|
| FY6959 | <i>h- loxP-rad8-I879A- 5FLAG::KanMX6 ura4-D18 leu1-32 ade6-M210 can1-1</i>                                  | This study   |
| FY5904 | <i>h- rad8-5FLAG::kanMX6 his3-D1 ura4-D18 leu1-32 ade6-M216</i>                                             | This study   |
| FY3123 | <i>h- Δrhp18::ura4+ ura4-D18 leu1-32 ade6-704</i>                                                           | Our stock    |
| FY6617 | <i>h- Δrhp18::ura4+ Δrad8::hphMX his3-D1 ura4-D18 leu1-32 ade6-M704</i>                                     | This study   |
| FY6628 | <i>h- Δmms2::leu2 his3-D1 ura4-D18 leu1-32 ade6-M210</i>                                                    | Our stock    |
| FY6619 | <i>h- Δmms2::leu2 Δrad8::hphMX his3-D1 ura4-D18 leu1-32 ade6-M210</i>                                       | This study   |
| FY6929 | <i>h- pcn1-K164R::ura4+ his3-D1 ura4-D18 leu1-32 ade6-M210</i>                                              | This study   |
| FY6115 | <i>h- pcn1-K164R::ura4+ Δrad8::hphMX his3-D1 ura4-D18 leu1-32 ade6-M210</i>                                 | This study   |
| FY6816 | <i>h- pcn1-K164R::ura4+ loxP-rad8-K535AT536A-loxM3 his3-D1 ura4-D18 leu1-32 ade6-M210</i>                   | This study   |
| FY6875 | <i>h- pcn1-K164R::ura4+ loxP-rad8-I879A-loxM3 his3-D1 ura4-D18 leu1-32 ade6-M210</i>                        | This study   |
| FY5128 | <i>h- Δsrs2::kan his3-D1 ura4-D18 leu1-32 ade6-M210</i>                                                     | Our stock    |
| FY5744 | <i>h- Δsrs2::kan Δrad8::hphMX his3-D1 ura4-D18 leu1-32 ade6-M210</i>                                        | This study   |
| FY4841 | <i>h- eso1::kanMX6 kpa1::bleMX6 rev3::hphMX6 his3-D1 ura4-D18 leu1-32 ade6-M216</i>                         | Our stock    |
| FY6863 | <i>h- eso1::kanMX6 kpa1::bleMX6 rev3::hphMX6 Δrad8::hphMX his3-D1 ura4-D18 leu1-32 ade6-M216</i>            | This study   |
|        |                                                                                                             | This study   |
|        |                                                                                                             | From         |
|        |                                                                                                             | MCW2080      |
|        |                                                                                                             | (Sun et al., |
|        |                                                                                                             | 2008)        |
| FY5555 | <i>h- Δfml1::natMX4 his3-D1 ura4-D18 leu1-32</i>                                                            | This study   |
| FY6436 | <i>h- Δfml1::natMX4 Δrad8::hphMX his3-D1 ura4-D18 leu1-32 ade6-M216</i>                                     | This study   |
| FY5587 | <i>h- Δfml2::kanMX6-Bioneer his3-D1 ura4-D18 leu1-32 ade6-M216</i>                                          | This study   |
| FY5726 | <i>h- Δfml2::kanMX6-Bioneer Δrad8::hphMX his3-D1 ura4-D18 leu1-32 ade6-M216</i>                             | This study   |
|        |                                                                                                             | This study   |
|        |                                                                                                             | From         |
|        |                                                                                                             | MCW2082      |
|        |                                                                                                             | (Sun et al., |
|        |                                                                                                             | 2008)        |
| FY6936 | <i>h- Δfml1::natMX4 Δfml2::KanMX6 his3-D1 ura4-D18 leu1-32</i>                                              | This study   |
| FY5717 | <i>h- Δfml1::natMX4 Δfml2::KanMX6 Δrad8::hphMX his3-D1 ura4-D18 leu1-32</i>                                 | This study   |
| FY6764 | <i>h- Δfml1::natMX4 Δfml2::KanMX6 loxP-rad8-K535AT536A-loxM3 ura4-D18 leu1-32</i>                           | This study   |
| FY6759 | <i>h- Δfml1::natMX4 Δfml2::KanMX6 loxP-rad8-K535AT536AI879A-loxM3 ura4-D18 leu1-32 ade6-M210</i>            | This study   |
| FY6766 | <i>h- Δfml1::natMX4 Δfml2::KanMX6 loxP-rad8-I879A-loxM3 his3-D1 ura4-D18 leu1-32</i>                        | This study   |
|        | <i>h- pcn1-K164R::ura4+ Δfml1::natMX4 Δfml2::KanMX6 loxP-rad8-K535AT536A-loxM3 his3-D1 ura4-D18 leu1-32</i> |              |
| FY6825 | <i>ade6-M210</i>                                                                                            | This study   |
| FY6826 | <i>h- pcn1-K164R::ura4+ Δfml1::natMX4 Δfml2::KanMX6 Δrad8::hphMX his3-D1 ura4-D18 leu1-32 ade6-M210</i>     | This study   |
|        |                                                                                                             | This study   |
|        |                                                                                                             | From         |
|        |                                                                                                             | MCW2080      |
|        |                                                                                                             | (Sun et al., |
|        |                                                                                                             | 2008)        |
| FY6257 | <i>h- Δfml1::natMX4 his3-D1 ura4-D18 leu1-32 ade6-M216</i>                                                  | This study   |
| FY6941 | <i>h- pcn1-K164R::ura4+ Δfml1::natMX his3-D1 ura4-D18 leu1-32 ade6-M210</i>                                 | This study   |
|        |                                                                                                             | This study   |
|        |                                                                                                             | From         |
| FY6948 | <i>h- Δfml2::KanMX6 ura4-D18 leu1-32 ade6-M210</i>                                                          | From         |
|        |                                                                                                             | MCW2082      |

|        |                                                                                                  |                    |
|--------|--------------------------------------------------------------------------------------------------|--------------------|
|        |                                                                                                  | (Sun et al., 2008) |
| FY6946 | <i>h- pcn1-K164R::ura4+ Δfml2::KanMX6 his3-D1 ura4-D18 leu1-32 ade6-M210</i>                     | This study         |
| FY6932 | <i>h- pcn1-K164R::ura4+ Δfml1::natMX4 Δfml2::KanMX6 his3-D1 ura4-D18 leu1-32 ade6-M210</i>       | This study         |
| FY2732 | <i>h- Δrad32::kanMX ura4-D18 leu1-32 ade6-M210</i>                                               | Our stock          |
| FY5892 | <i>h- Δrad32::kanMX Δrad8::hphMX his3-D1 ura4-D18 leu1-32 ade6-M216</i>                          | This study         |
| FY2733 | <i>h- Δrad50::kanMX ura4-D18 leu1-32 ade6-M210</i>                                               | Our stock          |
| FY5888 | <i>h- Δrad50::kanMX Δrad8::hphMX ura4-D18 leu1-32 ade6-M216</i>                                  | This study         |
| FY2734 | <i>h- Δnbs1::kanMX ura4-D18 leu1-32</i>                                                          | Our stock          |
| FY5895 | <i>h- Δnbs1::kanMX Δrad8::hphMX his3-D1 ura4-D18 leu1-32 ade6-M216</i>                           | This study         |
| FY5428 | <i>h- Δexo1::ura4+ ura4-D18 ade6-M210</i>                                                        | Our stock          |
| FY6141 | <i>h- Δexo1::ura4+ Δrad8::hphMX ura4-D18 ade6-M210</i>                                           | This study         |
| FY6820 | <i>h- Δexo1::ura4+ loxP-rad8-K535AT536A-loxM3 his3-D1 ura4-D18 leu1-32 ade6-M216</i>             | This study         |
| FY6879 | <i>h- Δexo1::ura4+ loxP-rad8-I879A-loxM3 his3-D1 ura4-D18 leu1-32 ade6-M216</i>                  | This study         |
| FY790  | <i>h- rad11A-ts ura4-D18 leu1-32 ade6-M216</i>                                                   | Our stock          |
| FY6797 | <i>h- rad11A-ts Δrad8::hphMX his3-D1 ura4-D18 leu1-32 ade6-M210</i>                              | This study         |
| FY3288 | <i>h- Δmus81::KanMX ura4-D18 ade6-M210</i>                                                       | Our stock          |
| FY6118 | <i>h- Δmus81::KanMX Δrad8::hphMX his3-D1 ura4-D18 ade6-M210</i>                                  | This study         |
| FY865  | <i>h- Δcds1::ura4 ura4-D18 leu1-32</i>                                                           | Our stock          |
| FY5739 | <i>h- Δcds1::ura4+ Δrad8::hphMX ura4-D18 leu1-32</i>                                             | This study         |
| FY6906 | <i>h- Δcds1::ura4 loxP-rad8-K535AT536A-loxM3 ura4-D18 leu1-32 ade6-M216</i>                      | This study         |
| FY6897 | <i>h- Δcds1::ura4 loxP-rad8-I879A-loxM3 ura4-D18 leu1-32 ade6-M216</i>                           | This study         |
| FY4685 | <i>h- Δmrc1::kanMX6-Bioneer his3-D1 ura4-D18 leu1-32 ade6-?</i>                                  | Our stock          |
| FY5742 | <i>h- Δmrc1::kanMX6-Bioneer Δrad8::hphMX his3-D1 ura4-D18 leu1-32 ade6-M210</i>                  | This study         |
| FY3529 | <i>h+ Δmrc1::ura4+ leu1+::(mrc1(all S/TQ to AQ)-3HA) ura4-D18 ade6?</i>                          | Our stock          |
| FY5885 | <i>h- Δmrc1::ura4+ leu1+::(mrc1(all S/TQ to AQ)-3HA) Δrad8::hphMX his3-D1 ura4-D18 ade6-M210</i> | This study         |
| FY3229 | <i>h- Δswi3::KanMX ura4-D18 leu1-32 ade6-M210</i>                                                | Our stock          |
| FY5784 | <i>h- Δswi3::KanMX Δrad8::hphMX his3-D1 ura4-D18 leu1-32 ade6-M210</i>                           | This study         |
| FY3226 | <i>h- Δswi1::kanMX his3-D1 ura4-D18 leu1-32 ade6-M210</i>                                        | Our stock          |
| FY5783 | <i>h- Δswi1::KanMX Δrad8::hphMX his3-D1 ura4-D18 leu1-32 ade6-M210</i>                           | This study         |
| FY6812 | <i>h- Δswi1::KanMX loxP-rad8-K535AT536A-loxM3 his3-D1 ura4-D18 leu1-32 ade6-M210</i>             | This study         |
| FY6871 | <i>h- Δswi1::KanMX loxP-rad8-I879A-loxM3 ura4-D18 leu1-32 ade6-M210</i>                          | This study         |
| FY6821 | <i>h- Δswi1::kanMX pcn1-K164R::ura4 his3-D1 ura4-D18 leu1-32 ade6-M210</i>                       | This study         |
| FY6400 | <i>h- Δrad8::hphMX his3-D1 ura4-D18 ade6-M210</i>                                                | This study         |
| FY6370 | <i>h- Δrad8::hphMX leu1-32::(nmt1-rad8-K535AT536A-GFP-leu1+) his3-D1 ura4-D18 ade6-M210</i>      | This study         |
| FY6372 | <i>h- Δrad8::hphMX leu1-32::(nmt1-rad8-I879A-GFP-leu1+) his3-D1 ura4-D18 ade6-M210</i>           | This study         |
| FY6374 | <i>h- Δrad8::hphMX leu1-32::(nmt1-rad8-K535AT536I879A-GFP-leu1+) his3-D1 ura4-D18 ade6-M210</i>  | This study         |
| FY6402 | <i>h- Δrad8::hphMX leu1-32::(nmt1-rad8-ΔHIRAN-GFP-leu1+) his3-D1 ura4-D18 ade6-M210</i>          | This study         |
| FY6522 | <i>h- Δrad8::hphMX leu1-32::(nmt1-rad8ΔHIRAN::SV40NLS-GFP-leu1+) his3-D1 ura4-D18 ade6-M210</i>  | This study         |
| FY6524 | <i>h- Δrad8::hphMX leu1-32::(nmt1-rad8ΔHIRAN::rad8NLS-GFP-leu1+) his3-D1 ura4-D18 ade6-M210</i>  | This study         |

|        |                                                                                         |                                                      |
|--------|-----------------------------------------------------------------------------------------|------------------------------------------------------|
| FY6526 | <i>h- Δrad8::hphMX leu1-32::(nmt1-rad8-no-NLS-GFP-leu1+) his3-D1 ura4-D18 ade6-M210</i> | This study                                           |
| FY6528 | <i>h- Δrad8::hphMX leu1-32::(nmt1-rad8-HIRAN-GFP-leu1+) his3-D1 ura4-D18 ade6-M210</i>  | This study                                           |
| FY3779 | <i>h- Δfbh1::kanMX leu1-32 ura4-D18</i>                                                 | Our stock                                            |
| FY5731 | <i>h- Δfbh1::kanMX Δrad8::hphMX ura4-D18 leu1-32 ade6-M216</i>                          | This study                                           |
| FY5745 | <i>h- Δtlh2::kanMX6-Bioneer his3-D1 ura4-D18 leu1-32 ade6-M210</i>                      | This study                                           |
| FY5746 | <i>h+ Δtlh2::kanMX6-Bioneer Δrad8::hphMX leu1-32 ura4-D18 ade6-M216</i>                 | This study                                           |
| FY5747 | <i>h- Δswr1::kanMX6-Bioneer his3-D1 ura4-D18 leu1-32 ade6-M210</i>                      | This study                                           |
| FY5748 | <i>h- Δswr1::kanMX6-Bioneer Δrad8::hphMX his3-D1 ura4-D18 leu1-32 ade6-M210</i>         | This study                                           |
| FY5749 | <i>h- ΔSPAC144.05::kanMX6-Bioneer leu1-32 ura4-D18 ade6-M210</i>                        | This study                                           |
| FY5750 | <i>h+ ΔSPAC144.05::kanMX6-Bioneer Δrad8::hphMX leu1-32 ura4-D18 ade6-M210</i>           | This study                                           |
| FY5751 | <i>h+ Δrrp1::kanMX6-Bioneer leu1-32 ura4-D18 ade6-M210</i>                              | This study                                           |
| FY5752 | <i>h- Δrrp1::kanMX6-Bioneer Δrad8::hphMX his3-D1 ura4-D18 leu1-32 ade6-M210</i>         | This study                                           |
| FY5753 | <i>h+ Δrdh54::kanMX6-Bioneer his3-D1 ura4-D18 leu1-32 ade6-M216</i>                     | This study                                           |
| FY5754 | <i>h- Δrdh54::kanMX6-Bioneer Δrad8::hphMX leu1-32 ura4-D18 ade6-M210</i>                | This study                                           |
| FY5755 | <i>h- Δchl1::kanMX6-Bioneer leu1-32 ura4-D18 ade6-M210</i>                              | This study                                           |
| FY5756 | <i>h+ Δchl1::kanMX6-Bioneer Δrad8::hphMX leu1-32 ura4-D18 ade6-M210</i>                 | This study                                           |
| FY5757 | <i>h- ΔSPAC694.02::kanMX6-Bioneer leu1-32 ura4-D18 ade6-M210</i>                        | This study                                           |
| FY5758 | <i>h+ ΔSPAC694.02::kanMX6-Bioneer Δrad8::hphMX his3-D1 ura4-D18 leu1-32 ade6-M216</i>   | This study                                           |
| FY5759 | <i>h- ΔSPBC15C4.05::kanMX6-Bioneer his3-D1 ura4-D18 leu1-32 ade6-M210</i>               | This study                                           |
| FY5760 | <i>h+ ΔSPBC15C4.05::kanMX6-Bioneer Δrad8::hphMX his3-D1 ura4-D18 leu1-32 ade6-M216</i>  | This study                                           |
| FY5761 | <i>h+ Δrrp2::kanMX6-Bioneer leu1-32 ura4-D18 ade6-M210</i>                              | This study                                           |
| FY5762 | <i>h- Δrrp2::kanMX6-Bioneer Δrad8::hphMX leu1-32 ura4-D18 ade6-M216 his3-D1</i>         | This study                                           |
| FY5763 | <i>h+ Δhrp1::kanMX6-Bioneer leu1-32 ura4-D18 ade6-M216 his3-D1</i>                      | This study                                           |
| FY5764 | <i>h+ Δhrp1::kanMX6-Bioneer Δrad8::hphMX leu1-32 ura4-D18 ade6-M210</i>                 | This study                                           |
| FY5765 | <i>h- Δrhp26::kanMX6-Bioneer leu1-32 ura4-D18 ade6-M210</i>                             | This study                                           |
| FY5766 | <i>h+ Δrhp26::kanMX6-Bioneer Δrad8::hphMX leu1-32 ura4-D18 ade6-M216</i>                | This study                                           |
| FY5767 | <i>h+ Δirc3::kanMX6-Bioneer leu1-32 ura4-D18 ade6-M210</i>                              | This study                                           |
| FY5768 | <i>h- Δirc3::kanMX6-Bioneer Δrad8::hphMX his3-D1 ura4-D18 leu1-32 ade6-M216</i>         | This study                                           |
| FY5769 | <i>h- ΔSPBC582.10C::kanMX6-Bioneer his3-D1 ura4-D18 leu1-32 ade6-M210</i>               | This study                                           |
| FY5770 | <i>h+ ΔSPBC582.10C::kanMX6-Bioneer Δrad8::hphMX ura4-D18 leu1-32 ade6-M210</i>          | This study                                           |
| FY5771 | <i>h+ ΔSPCC737.07c::kanMX6-Bioneer his3-D1 ura4-D18 leu1-32 ade6-M216</i>               | This study                                           |
| FY5772 | <i>h+ ΔSPCC737.07c::kanMX6-Bioneer Δrad8::hphMX ura4-D18 leu1-32 ade6-M210</i>          | This study                                           |
| FY5773 | <i>h- Δhrp3::kanMX6-Bioneer his3-D1 leu1-32 ura4-D18 ade6-M216</i>                      | This study                                           |
| FY5774 | <i>h- Δhrp3::kanMX6-Bioneer Δrad8::hphMX ura4-D18 leu1-32 ade6-M210</i>                 | This study                                           |
| FY4777 | <i>h- Δsnf22::KanMX ura4-D18 leu1-32</i>                                                | This study                                           |
| FY5779 | <i>h- Δsnf22::KanMX Δrad8::hphMX his3-D1 ura4-D18 leu1-32</i>                           | This study<br>HT21<br>(Boule and<br>Zakian,<br>2006) |
| FY4703 | <i>h- pfh1-R20 leu1-32</i>                                                              |                                                      |

|        |                                                                             |            |
|--------|-----------------------------------------------------------------------------|------------|
| FY6483 | <i>h- pfh1-R20 Δrad8::hphMX ura4-D18 leu1-32 ade6-M216</i>                  | This study |
| FY6337 | <i>h- Δrad8::hphMX ade6-M210</i>                                            | This study |
| FY6434 | <i>h- rad8-GFP::kanMX6 ade6-M210</i>                                        | This study |
| FY2194 | <i>h- Δrad3::ura4+ ura4-D18 ade6-M216</i>                                   | Our stock  |
| FY6315 | <i>h- loxP-rad8<sup>+</sup>-loxM3 leu1-32 ade6-M210 ura4-D18 can1-1</i>     | This study |
| FY6317 | <i>h- loxP-rad8-ΔHIRAN-loxM3 leu1-32 ade6-M210 ura4-D18 can1-1</i>          | This study |
| FY6319 | <i>h- loxP-rad8-K535AT536A-loxM3 leu1-32 ade6-M210 ura4-D18 can1-1</i>      | This study |
| FY6321 | <i>h- loxP-rad8-I879A-loxM3 leu1-32 ade6-M210 ura4-D18 can1-1</i>           | This study |
| FY6284 | <i>h- loxP-rad8-K535AT536AI879A-loxM3 leu1-32 ade6-M210 ura4-D18 can1-1</i> | This study |
| FY6323 | <i>h- loxP-Δrad8-loxM3 leu1-32 ade6-M210 ura4-D18 can1-1</i>                | This study |
| FY6394 | <i>h- loxP-rad8-S18D-loxM3 leu1-32 ade6-M210 ura4-D18 can1-1</i>            | This study |
| FY6399 | <i>h- loxP-rad8-S18A-loxM3 leu1-32 ade6-M210 ura4-D18 can1-1</i>            | This study |

---

**Table S2 Plasmids used in this study**

| Plasmid   | Purpose                                                                                      | Source            |
|-----------|----------------------------------------------------------------------------------------------|-------------------|
| pAW1      | To construct <i>lox</i> -Cre base strain for <i>rad8</i> FY5622                              | EUROSCARF: P30537 |
| pAW8-Xhol | To make swap the <i>loxP loxM3</i> flanked region in the genome of FY5622                    | EUROSCARF: P30585 |
| pLD45     | To make swap the <i>loxP loxM3</i> flanked region in FY5622 with <i>rad8</i> <sup>+</sup>    | This study        |
| pLD46     | To make swap the <i>loxP loxM3</i> flanked region in FY5622 with <i>rad8-ΔHIRAN</i>          | This study        |
| pLD47     | To make swap the <i>loxP loxM3</i> flanked region in FY5622 with <i>rad8-K535AT536A</i>      | This study        |
| pLD48     | To make swap the <i>loxP loxM3</i> flanked region in FY5622 with <i>rad8-I879A</i>           | This study        |
| pLD49     | To make swap the <i>loxP loxM3</i> flanked region in FY5622 with <i>rad8-K535AT536AI879A</i> | This study        |
| pLD99     | To make swap the <i>loxP loxM3</i> flanked region in FY5622 with <i>rad8-ΔHIRAN::SV40NLS</i> | This study        |
| pLD100    | To make swap the <i>loxP loxM3</i> flanked region in FY5622 with <i>rad8-ΔHIRAN::Rad8NLS</i> | This study        |
| pLD101    | To make swap the <i>loxP loxM3</i> flanked region in FY5622 with <i>rad8-ΔNLS</i>            | This study        |
| pLD102    | To make swap the <i>loxP loxM3</i> flanked region in FY5622 with <i>rad8-HIRAN</i>           | This study        |
| pJK148    | Integration at <i>leu1-32</i> locus                                                          | Our stock         |
| pLD52     | To integrate <i>rad8</i> <sup>+</sup> - <i>GFP</i> into <i>leu1-32</i> locus                 | This study        |
| pLD54     | To integrate <i>rad8-K535AT536A-GFP</i> into <i>leu1-32</i> locus                            | This study        |
| pLD55     | To integrate <i>rad8-I879A-GFP</i> into <i>leu1-32</i> locus                                 | This study        |
| pLD56     | To integrate <i>rad8-K535AT536AI879A-GFP</i> into <i>leu1-32</i> locus                       | This study        |
| pLD53     | To integrate <i>rad8-ΔHIRAN-GFP</i> into <i>leu1-32</i> locus                                | This study        |
| pLD96     | To integrate <i>rad8-ΔHIRAN::SV40NLS-GFP</i> into <i>leu1-32</i> locus                       | This study        |
| pLD96     | To integrate <i>rad8-ΔHIRAN::Rad8NLS-GFP</i> into <i>leu1-32</i> locus                       | This study        |
| pLD97     | To integrate <i>rad8-ΔNLS-GFP</i> into <i>leu1-32</i> locus                                  | This study        |
| pLD98     | To integrate <i>rad8-HIRAN-GFP</i> into <i>leu1-32</i> locus                                 | This study        |

**Table S3 An analysis of the drug sensitivity of non-essential helicase mutants**

| Group                                 | genotype               | orthologs                  | growth | HU | MMS | UV  | CPT |
|---------------------------------------|------------------------|----------------------------|--------|----|-----|-----|-----|
| 1:<br>MMS<br>specific                 | $\Delta rhp26$         | hXRCC3<br>ScRad26          | -      | -  | ↓   | -   | ↓   |
|                                       | $\Delta rad8$          | HLTF, SHPRH<br>ScRad8      | -      | -  | ↓↓  | ↓   | -   |
| 2: response<br>to protein<br>barriers | $\Delta hrp1$          | hCHD1, 2<br>ScChd1         | -      | -  | -   | -   | ↓↓  |
|                                       | $\Delta swr1$          | hEP400, hSRCAP<br>ScSwr1   | -      | -  | -   | -   | ↓↓  |
|                                       | $\Delta SPBC15C4.05\#$ | hDHX29                     | -      | -  | -   | -   | ↓↓↓ |
| 3:<br>regulates<br>HR                 | $\Delta snf22$         | hSMARCA4<br>ScSth1, ScSnf2 | -      | ↓↓ | -   | -   | ↓   |
|                                       | $\Delta srs2$          | ScSrs2                     | -      | ↓  | -   | -   | ↓   |
|                                       | $\Delta SPAC694.02^*$  | hDDX60, hDDX60L            | -      | ↓↓ | -   | -   | ↓↓↓ |
| 4:<br>HR-<br>associated               | $\Delta chl1$          | hFANCI<br>ScChl1           | -      | ↓  | ↓   | ↓   | ↓   |
|                                       | $\Delta fml1$          | hFANCM<br>ScMph1           | -      | ↓  | ↓↓  | ↓   | ↓   |
|                                       | $\Delta fbh1$          | hFBXO18                    | -      | ↓  | ↓↓  | ↓↓  | ↓   |
|                                       | $\Delta rqh1$          | hWRN, hBLM<br>ScSgs1       | -      | ↓↓ | ↓↓  | ↓↓↓ | ↓↓↓ |
|                                       | $\Delta rad54$         | hRAD54L<br>ScRad54         | ↓      | ↓↓ | ↓↓↓ | ↓↓  | ↓↓↓ |
|                                       | $\Delta rad57$         | hXRCC3<br>ScRad57          | -      | ↓  | ↓↓  | ↓   | ↓↓↓ |
| 5:<br>no<br>phenotype                 | $\Delta hrp3$          | hCHD1, hCHD2<br>ScChd1     | -      | -  | -   | -   | -   |
|                                       | $\Delta fml2$          | hFANCM<br>ScMph1           | -      | -  | -   | -   | -   |
|                                       | $\Delta rrp1$          | hTTF2<br>ScUls1            | -      | -  | -   | -   | -   |
|                                       | $\Delta rrp2$          | hHLTF<br>ScUls1            | -      | -  | -   | -   | -   |
|                                       | $\Delta SPBC3B8.12^*$  | ScIrc3                     | -      | -  | -   | -   | -   |
|                                       | $\Delta SPBC582.10C$   | ScRad16                    | -      | -  | -   | -   | -   |
|                                       | $\Delta rdh54$         | hRAD54B<br>ScRdh54         | -      | -  | -   | -   | -   |
|                                       | $\Delta SPCC737.07c$   | hIGHMBP2<br>ScHcs1         | -      | -  | -   | -   | -   |
|                                       | $\Delta tlh2$          | NA                         | -      | -  | -   | -   | -   |
|                                       | $\Delta SPAC144.05$    | hSHPRH<br>ScIRC20          | -      | -  | -   | -   | -   |
| $\Delta rad55$                        | hRAD51B<br>ScRad55     | -                          | -      | -  | -   | -   |     |

The level of sensitivity is scored by the fitness on the drug plates. No difference from wildtype is labeled as “-”. The level of sickness is scored by number of “↓”. NA = not available. h = Homo sapiens. Sc = *Saccharomyces cerevisiae*. HR = Homologous recombination. # RNA/DNA helicase. \* RNA helicase. SPBC3B8.12 = SPBC11C11.11c.



**Table S4 A survey of *rad8* genetic interaction with helicase mutants on different drugs**

|                            | genotype                       | growth         | HU  | MMS            | UV | CPT |
|----------------------------|--------------------------------|----------------|-----|----------------|----|-----|
| no synthetic defects       | <i>Δhrp3 Δrad8</i>             | -              | -   | -              | -  | -   |
|                            | <i>Δtlh2 Δrad8</i>             | -              | -   | -              | -  | -   |
|                            | <i>Δhrp1 Δrad8</i>             | -              | -   | -              | -  | -   |
|                            | <i>Δswr1 Δrad8</i>             | -              | -   | -              | -  | -   |
|                            | <i>Δrdh54 Δrad8</i>            | -              | -   | -              | -  | -   |
|                            | <i>Δrrp1 Δrad8</i>             | -              | -   | -              | -  | -   |
|                            | <i>Δrrp2 Δrad8</i>             | -              | -   | -              | -  | -   |
|                            | <i>ΔSPBC3B8.12 Δrad8</i>       | -              | -   | -              | -  | -   |
|                            | <i>ΔSPBC15C4.05 Δrad8</i>      | -              | -   | -              | -  | -   |
|                            | <i>ΔSPBC582.10C Δrad8</i>      | -              | -   | -              | -  | -   |
|                            | <i>ΔSPAC694.02 Δrad8</i>       | -              | -   | ↑ <sup>§</sup> | -  | -   |
|                            | <i>Δ SPCC737.07c Δrad8</i>     | -              | -   | -              | -  | -   |
|                            | <i>ΔSPAC144.05 Δrad8</i>       | -              | -   | -              | -  | -   |
|                            | <i>cdc21-M68 Δrad8</i>         | -              | -   | -              | -  | -   |
| <i>cdc21-C84 Δrad8</i>     | -                              | -              | -   | -              | -  |     |
| Increased drug sensitivity | <i>Δrhp26 Δrad8</i>            | -              | -   | ↓↓             | -  | -   |
|                            | <i>Δfbh1 Δrad8</i>             | -              | -   | ↓              | ↓  | -   |
|                            | <i>Δrqh1 Δrad8</i>             | -              | ↓   | ↓↓             | ↓  | ND  |
|                            | <i>Δrad54 Δrad8</i>            | ↓              | ↓↓↓ | ↓↓             | ↓  | ↓   |
|                            | <i>Δrad55 Δrad8</i>            | ↓              | ↓   | ↓↓             | ↓↓ | ↓↓  |
|                            | <i>Δrad57 Δrad8</i>            | -              | ↓   | ↓↓             | ↓  | ↓   |
|                            | <i>pfh1-R20 Δrad8</i>          | -              | ↑   | ↓              | -  | -   |
|                            | <i>dna2-K961T Δrad8</i>        | -              | ↓   | ↓↓             | ↓  | ND  |
|                            | <i>dna2<sup>ts</sup> Δrad8</i> | -              | -   | ↓              | ↓  | -   |
|                            | <i>Δfml1 Δrad8</i>             | -              | ↓↓  | ↓↓             | ↓↓ | ↓↓  |
| <i>Δfml2 Δrad8</i>         | -                              | -              | ↓   | -              | -  |     |
| mixed drug sensitivity     | <i>Δfml1 Δfml2 Δrad8</i>       | -<br>elongated | ↓↓  | ↓↓↓            | ↓↓ | ↑   |
|                            | <i>Δchl1 Δrad8</i>             | -              | -   | ↓↓             | -  | ↑   |
|                            | <i>Δsrs2 Δrad8</i>             | -              | ↑   | ↓              | -  | ↓↓  |
|                            | <i>Δsnf22 Δrad8</i>            | -              | ↑   | -              | -  | ↓   |

The level of sensitivity is scored by the fitness on the drug plates. No difference from the either of the single mutants is labeled as “-”. The level of increased drug sensitivity is scored by number of “↓”. The level of reduced drug sensitivity is scored by number of “↑”. ND = not determined. <sup>§</sup> one RNA helicase partially decreased the MMS sensitivity of *rad8*. SPBC3B8.12 = SPBC11C11.11c.

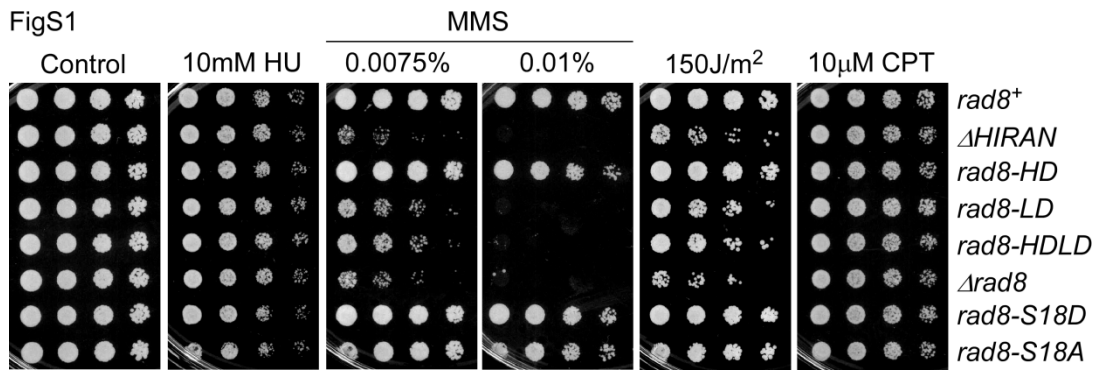

**Figure S1 S18 is not required for Rad8 DNA damage response.** Strains were grown overnight at 32°C, 1:5 serially diluted and spotted to plain YES rich medium (Control) and YES with indicated drugs. Plates were incubated at 32°C for 3 days.

Fig.S2

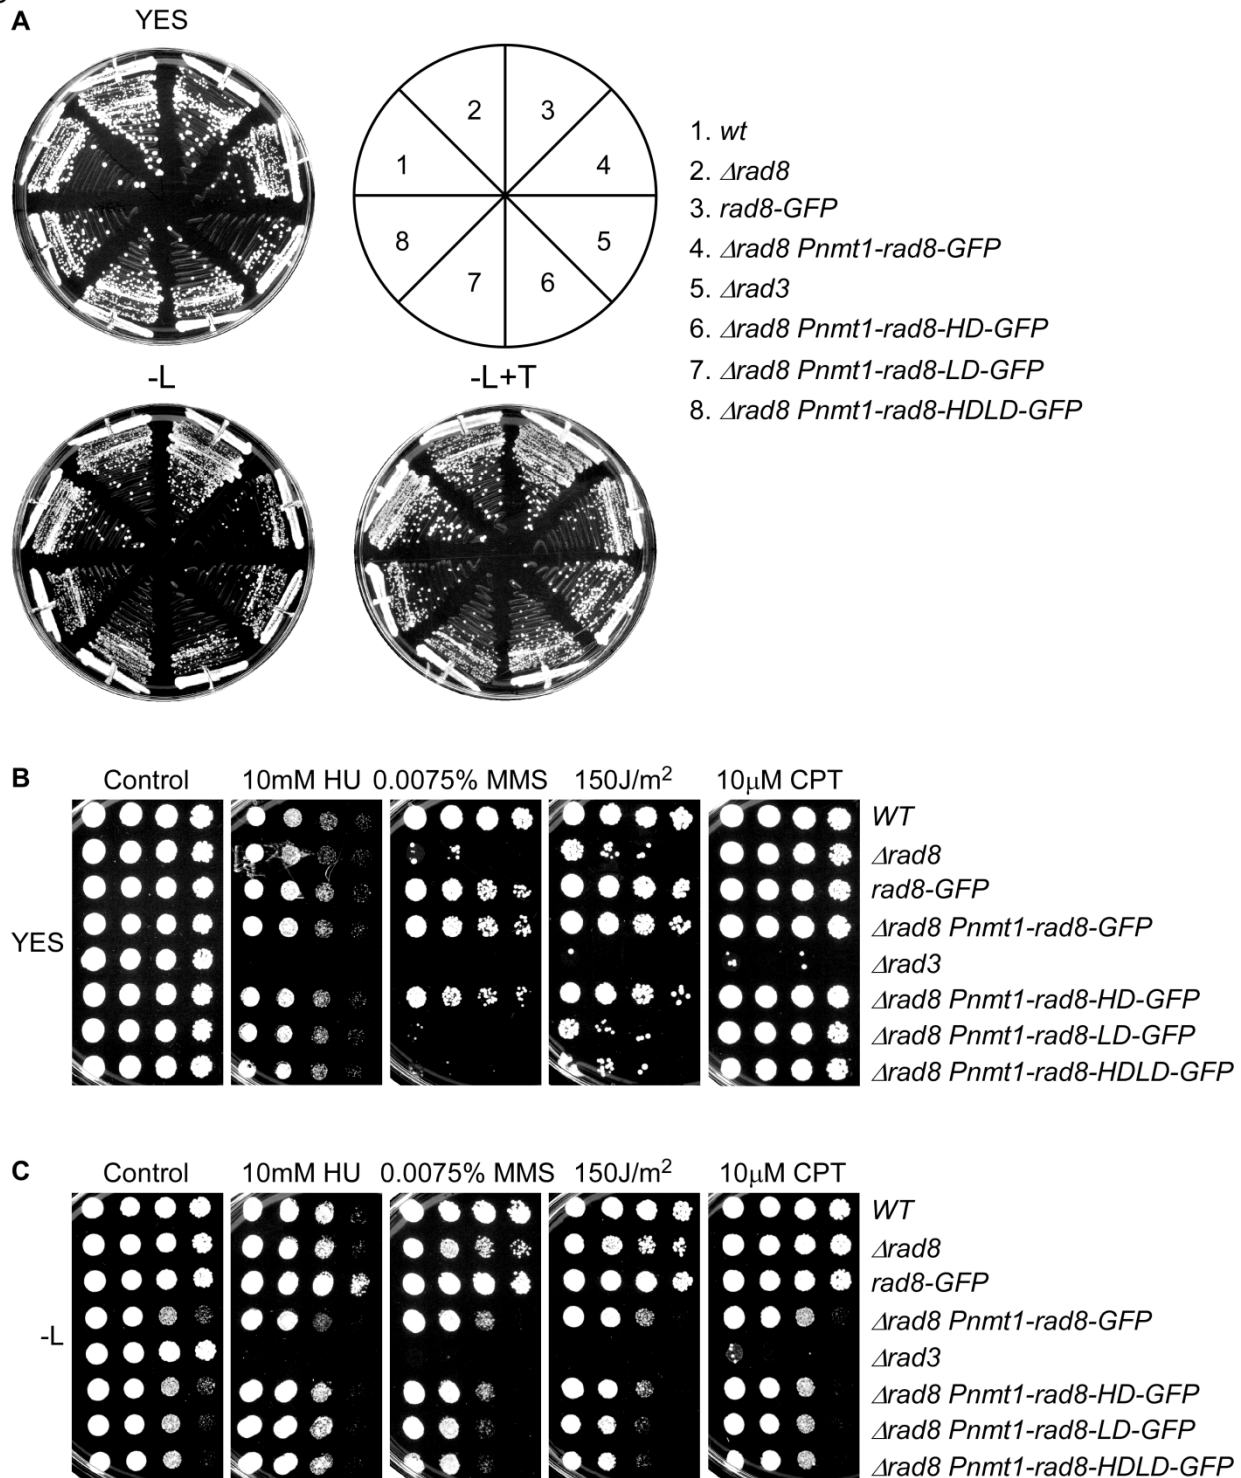

**Figure S2 Overproduction of *rad8* in  $\Delta rad8$  has minor defects.** (A) Overproduction (EMM-LEU plate) of *rad8-GFP* causes slightly growth defect. Strains were streaked out on different medium according to the schematics. (B) *rad8-GFP* fully complements  $\Delta rad8$  and cells mount the same response to damaging drugs in the presence of thiamine (YES). Strains were grown overnight at 32°C, 1:5 serially diluted and spotted to plain YES rich medium (Control) and YES with indicated drugs. (C) Overproduction of *rad8-GFP* and mutants is slightly toxic to cells. Strains were grown overnight at 32°C, washed twice with EMM-LEU medium, 1:5 serially diluted in EMM-LEU and spotted to EMM-LEU medium (Control) and EMM-LEU with indicated drugs. Plates were incubated at 32°C for 3 days if not indicated.

Fig.S3

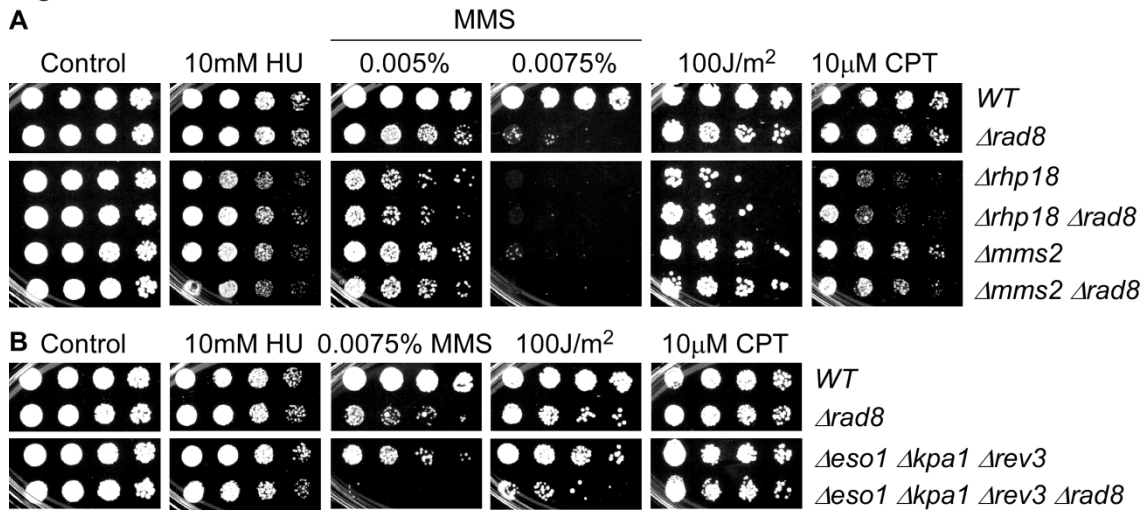

**Figure S3 Rad8 functions in the PRR pathway.** (A) *rad8Δ* is epistatic with *rhp18Δ* and *mms2Δ*. Strains were grown overnight at 32°C, 1:5 serially diluted and spotted to plain YES rich medium (Control) and YES with indicated drugs. (B) *rad8Δ* is not epistatic with TLS mutants. Strains were grown overnight at 32°C, 1:5 serially diluted and spotted to plain YES rich medium (Control) and YES with indicated drugs. Plates were incubated at 32°C for 3 days.



Fig.S5

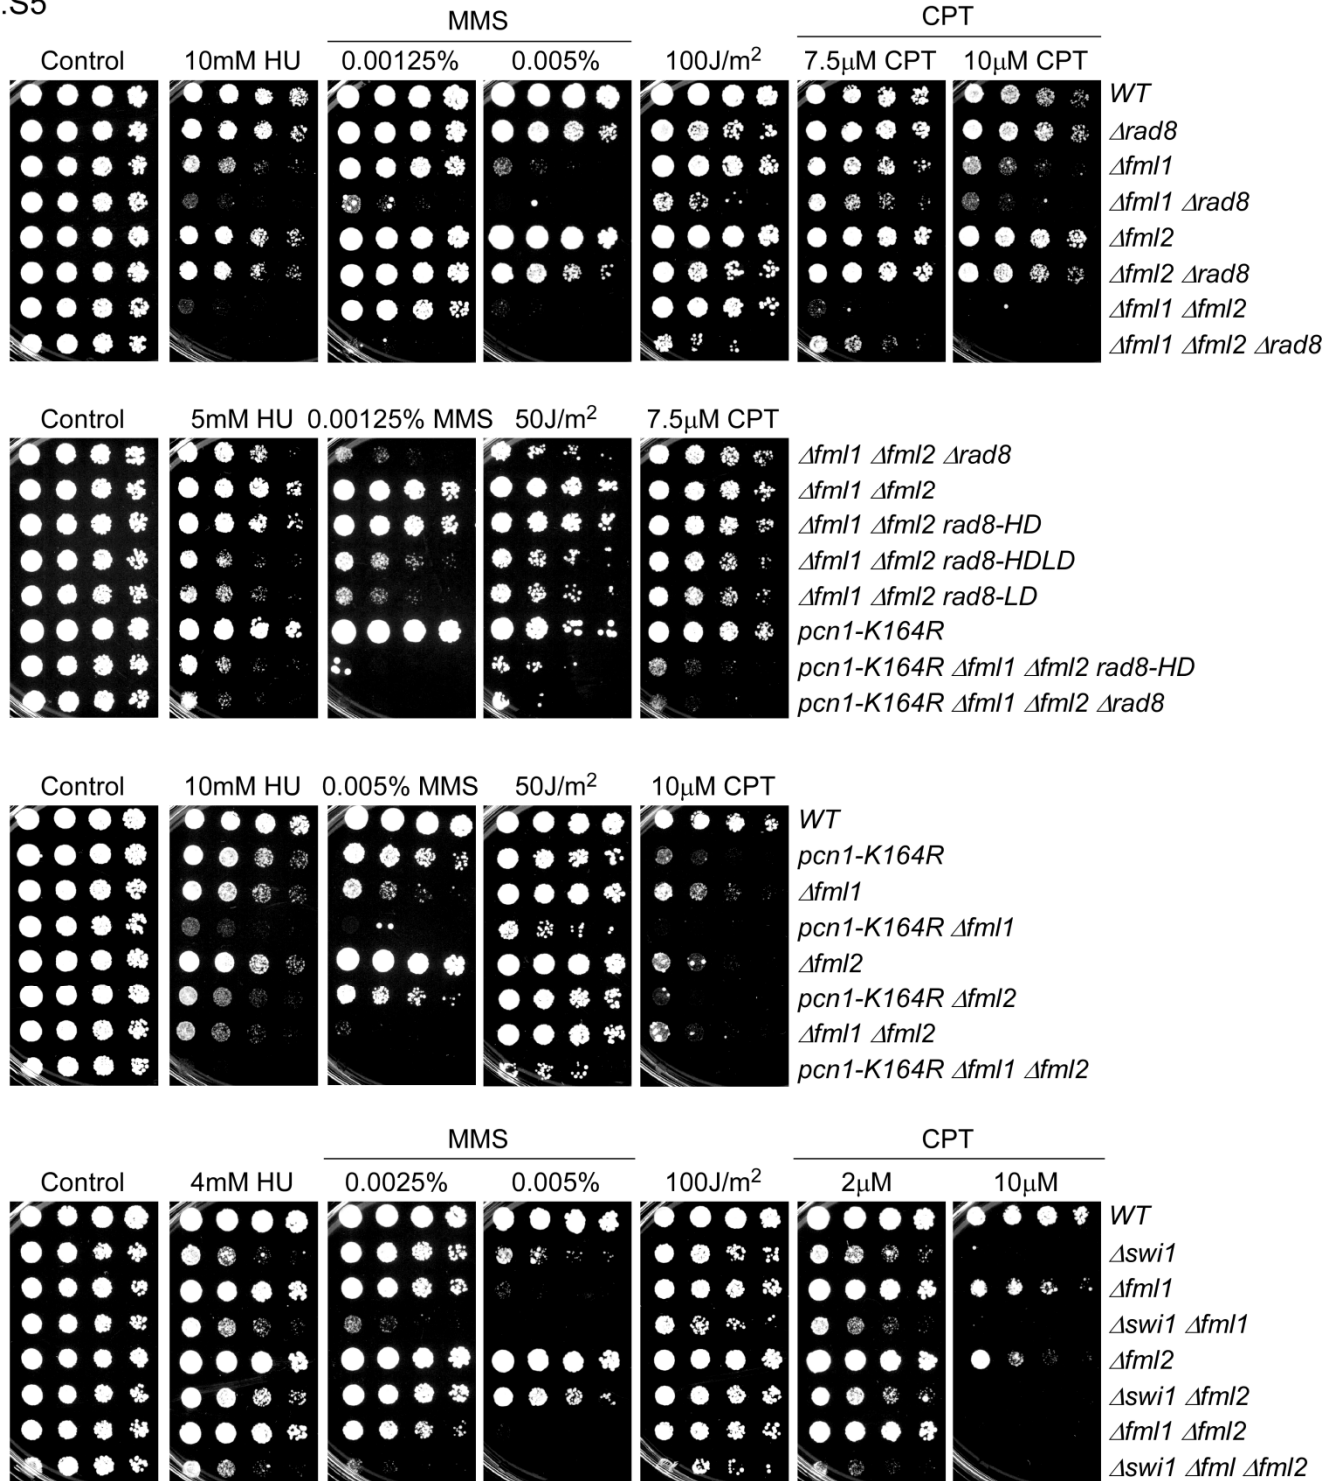

**Figure S5 Fml1 and Rad8 ligase domain are functionally redundant.** Strains were grown overnight at 32°C, 1:5 serially diluted and spotted to plain YES rich medium (Control) and YES with indicated drugs. Plates were incubated at 32°C for 3 days.

FigS6

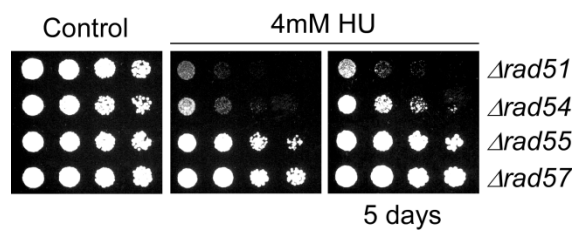

**Figure S6** A comparison of the sensitivity of homologues recombination mutants to HU. Strains were grown overnight at 32°C, 1:5 serially diluted and spotted to plain YES rich medium (Control) and YES with indicated drugs. Plates were incubated at 32°C for 3 days unless otherwise indicated.
