# Supplementary material for: Essential Domains ofSchizosaccharomyces pombeRad8 Required for DNA Damage Response
Source: Oxford University Press journal article supplement (doi:10.1534/g3.114.011346), 2014-05-30
Supplement: 011346_figures2.pdf [file 011346_figures2.pdf]

Fig.S2

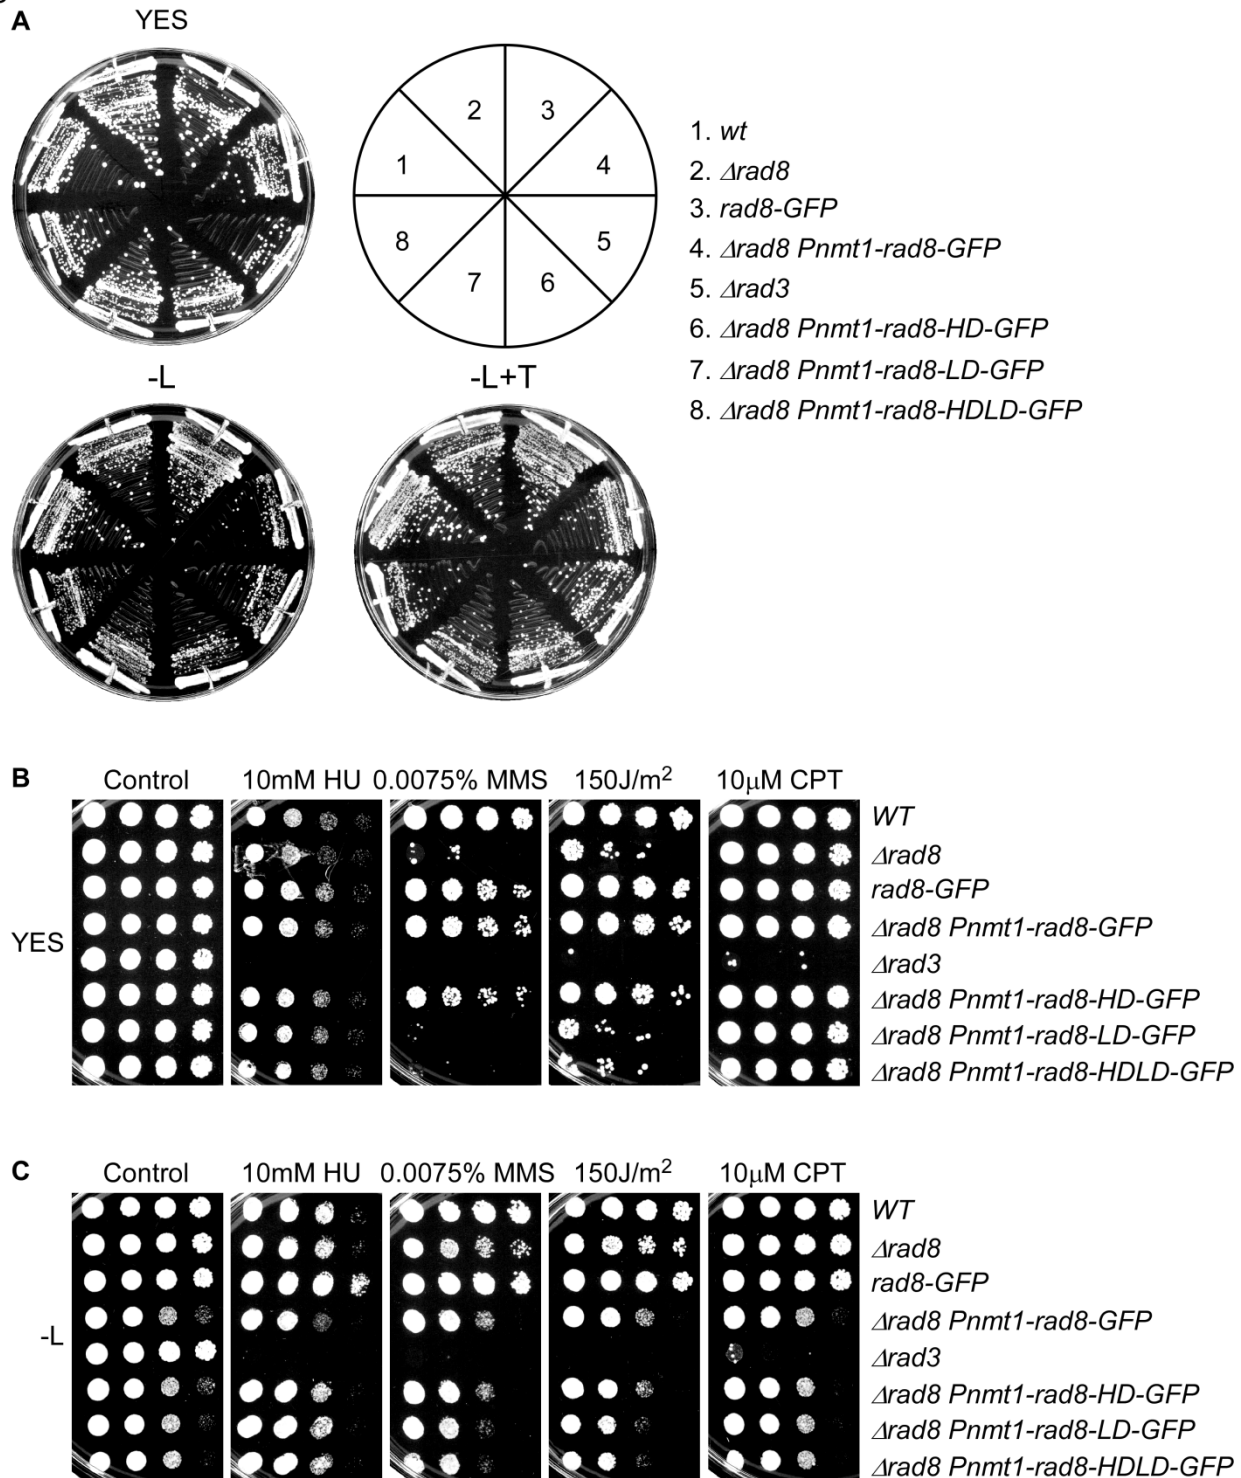

**Figure S2 Overproduction of *rad8* in  $\Delta rad8$  has minor defects.** (A) Overproduction (EMM-LEU plate) of *rad8-GFP* causes slightly growth defect. Strains were streaked out on different medium according to the schematics. (B) *rad8-GFP* fully complements  $\Delta rad8$  and cells mount the same response to damaging drugs in the presence of thiamine (YES). Strains were grown overnight at 32°C, 1:5 serially diluted and spotted to plain YES rich medium (Control) and YES with indicated drugs. (C) Overproduction of *rad8-GFP* and mutants is slightly toxic to cells. Strains were grown overnight at 32°C, washed twice with EMM-LEU medium, 1:5 serially diluted in EMM-LEU and spotted to EMM-LEU medium (Control) and EMM-LEU with indicated drugs. Plates were incubated at 32°C for 3 days if not indicated.
