# Supplementary material for: Essential Domains ofSchizosaccharomyces pombeRad8 Required for DNA Damage Response
Source: Oxford University Press journal article supplement (doi:10.1534/g3.114.011346), 2014-05-30
Supplement: 011346_figures4.pdf [file 011346_figures4.pdf]

Fig.S4

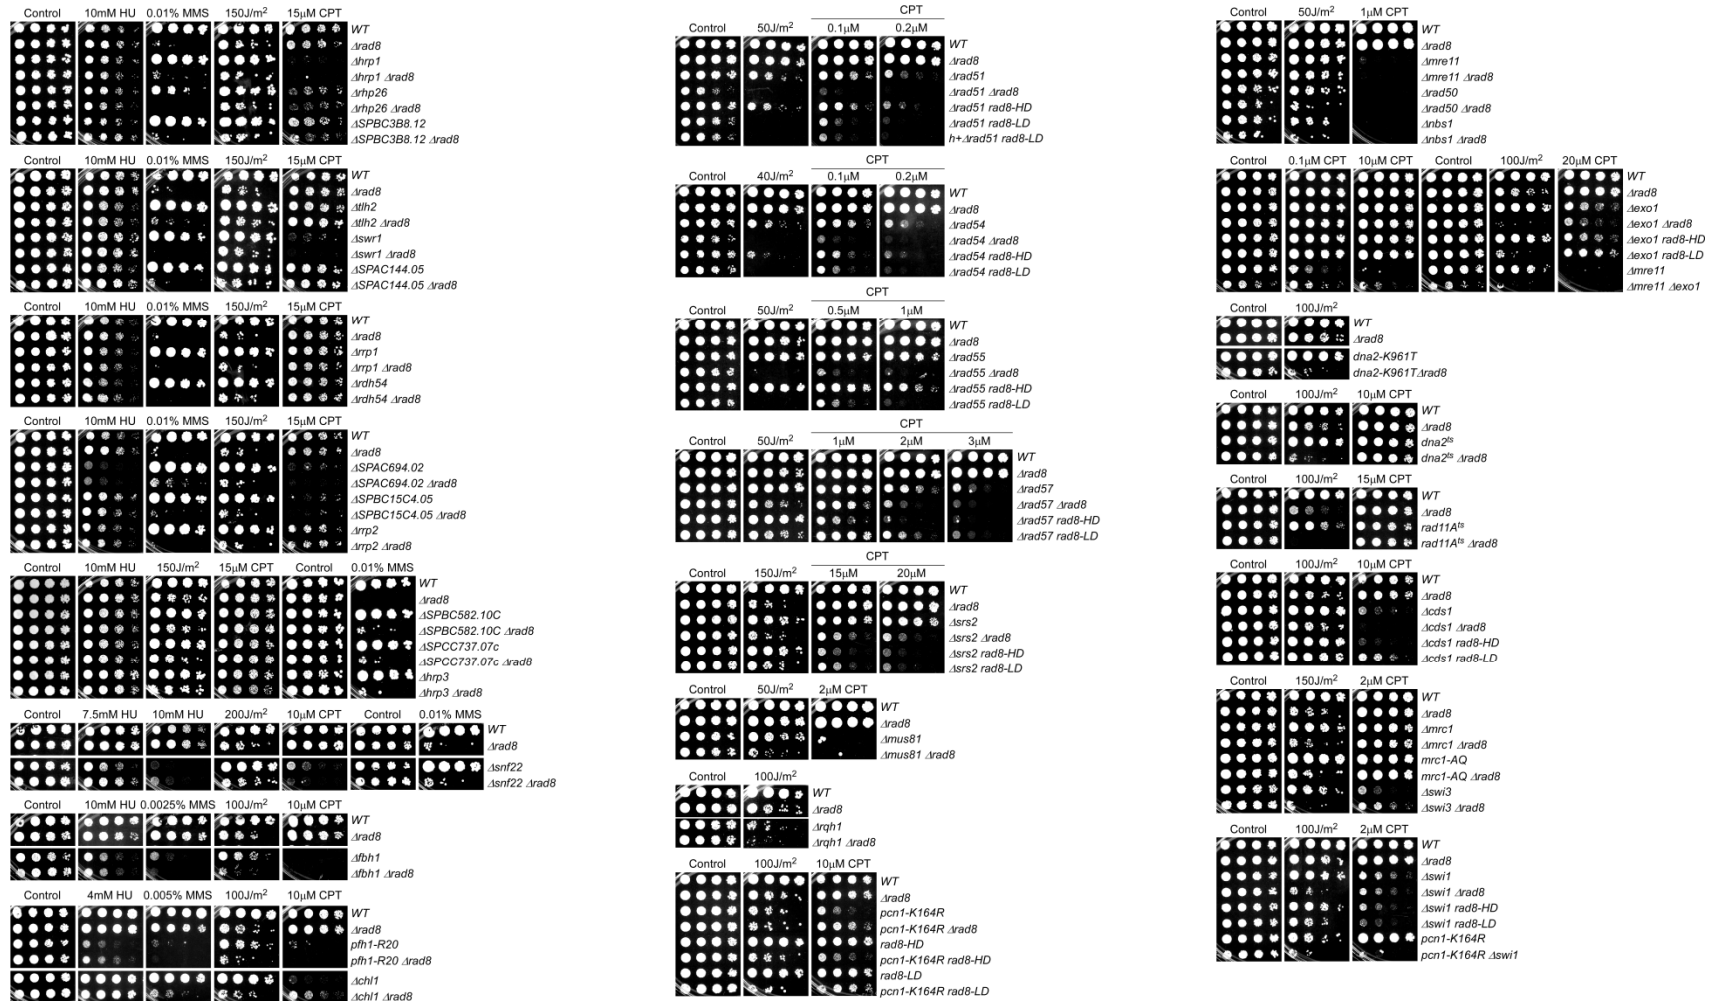

**Figure S4 A damage fingerprint of helicase mutants** Strains were grown overnight at 32°C or 25°C for ts strains, 1:5 serially diluted and spotted to plain YES rich medium (Control) and YES with indicated drugs. Plates were incubated at 32°C for 3 days or 25°C for 5 days.
