# Supplementary material for: Essential Domains ofSchizosaccharomyces pombeRad8 Required for DNA Damage Response
Source: Oxford University Press journal article supplement (doi:10.1534/g3.114.011346), 2014-05-30
Supplement: 011346_figures6.pdf [file 011346_figures6.pdf]

FigS6

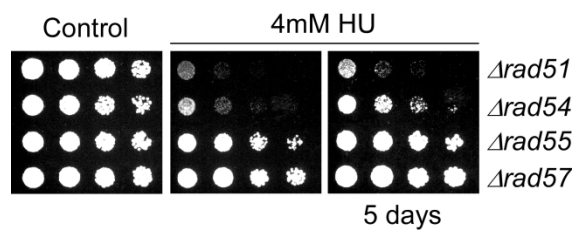

**Figure S6** A comparison of the sensitivity of homologues recombination mutants to HU. Strains were grown overnight at 32°C, 1:5 serially diluted and spotted to plain YES rich medium (Control) and YES with indicated drugs. Plates were incubated at 32°C for 3 days unless otherwise indicated.
