# Supplementary material for: Essential Domains ofSchizosaccharomyces pombeRad8 Required for DNA Damage Response
Source: Oxford University Press journal article supplement (doi:10.1534/g3.114.011346), 2014-05-30
Supplement: 011346_tables2.pdf [file 011346_tables2.pdf]

**Table S2 Plasmids used in this study**

| Plasmid   | Purpose                                                                                                        | Source            |
|-----------|----------------------------------------------------------------------------------------------------------------|-------------------|
| pAW1      | To construct <i>lox</i> -Cre base strain for <i>rad8</i> $\Delta$ FY5622                                       | EUROSCARF: P30537 |
| pAW8-Xhol | To make swap the <i>loxP loxM3</i> flanked region in the genome of FY5622                                      | EUROSCARF: P30585 |
| pLD45     | To make swap the <i>loxP loxM3</i> flanked region in FY5622 with <i>rad8</i> <sup>+</sup>                      | This study        |
| pLD46     | To make swap the <i>loxP loxM3</i> flanked region in FY5622 with <i>rad8-<math>\Delta</math>HIRAN</i>          | This study        |
| pLD47     | To make swap the <i>loxP loxM3</i> flanked region in FY5622 with <i>rad8-K535AT536A</i>                        | This study        |
| pLD48     | To make swap the <i>loxP loxM3</i> flanked region in FY5622 with <i>rad8-I879A</i>                             | This study        |
| pLD49     | To make swap the <i>loxP loxM3</i> flanked region in FY5622 with <i>rad8-K535AT536AI879A</i>                   | This study        |
| pLD99     | To make swap the <i>loxP loxM3</i> flanked region in FY5622 with <i>rad8-<math>\Delta</math>HIRAN::SV40NLS</i> | This study        |
| pLD100    | To make swap the <i>loxP loxM3</i> flanked region in FY5622 with <i>rad8-<math>\Delta</math>HIRAN::Rad8NLS</i> | This study        |
| pLD101    | To make swap the <i>loxP loxM3</i> flanked region in FY5622 with <i>rad8-<math>\Delta</math>NLS</i>            | This study        |
| pLD102    | To make swap the <i>loxP loxM3</i> flanked region in FY5622 with <i>rad8-HIRAN</i>                             | This study        |
| pJK148    | Integration at <i>leu1-32</i> locus                                                                            | Our stock         |
| pLD52     | To integrate <i>rad8</i> <sup>+</sup> - <i>GFP</i> into <i>leu1-32</i> locus                                   | This study        |
| pLD54     | To integrate <i>rad8-K535AT536A-GFP</i> into <i>leu1-32</i> locus                                              | This study        |
| pLD55     | To integrate <i>rad8-I879A-GFP</i> into <i>leu1-32</i> locus                                                   | This study        |
| pLD56     | To integrate <i>rad8-K535AT536AI879A-GFP</i> into <i>leu1-32</i> locus                                         | This study        |
| pLD53     | To integrate <i>rad8-<math>\Delta</math>HIRAN-GFP</i> into <i>leu1-32</i> locus                                | This study        |
| pLD96     | To integrate <i>rad8-<math>\Delta</math>HIRAN::SV40NLS-GFP</i> into <i>leu1-32</i> locus                       | This study        |
| pLD96     | To integrate <i>rad8-<math>\Delta</math>HIRAN::Rad8NLS-GFP</i> into <i>leu1-32</i> locus                       | This study        |
| pLD97     | To integrate <i>rad8-<math>\Delta</math>NLS-GFP</i> into <i>leu1-32</i> locus                                  | This study        |
| pLD98     | To integrate <i>rad8-HIRAN-GFP</i> into <i>leu1-32</i> locus                                                   | This study        |
