# Supplementary material for: Essential Domains ofSchizosaccharomyces pombeRad8 Required for DNA Damage Response
Source: Oxford University Press journal article supplement (doi:10.1534/g3.114.011346), 2014-05-30
Supplement: 011346_tables3.pdf [file 011346_tables3.pdf]

**Table S3 An analysis of the drug sensitivity of non-essential helicase mutants**

| Group                                 | genotype               | orthologs                  | growth | HU | MMS | UV  | CPT |
|---------------------------------------|------------------------|----------------------------|--------|----|-----|-----|-----|
| 1:<br>MMS<br>specific                 | $\Delta rhp26$         | hXRCC3<br>ScRad26          | -      | -  | ↓   | -   | ↓   |
|                                       | $\Delta rad8$          | HLTF, SHPRH<br>ScRad8      | -      | -  | ↓↓  | ↓   | -   |
| 2: response<br>to protein<br>barriers | $\Delta hrp1$          | hCHD1, 2<br>ScChd1         | -      | -  | -   | -   | ↓↓  |
|                                       | $\Delta swr1$          | hEP400, hSRCAP<br>ScSwr1   | -      | -  | -   | -   | ↓↓  |
|                                       | $\Delta SPBC15C4.05\#$ | hDHX29                     | -      | -  | -   | -   | ↓↓↓ |
| 3:<br>regulates<br>HR                 | $\Delta snf22$         | hSMARCA4<br>ScSth1, ScSnf2 | -      | ↓↓ | -   | -   | ↓   |
|                                       | $\Delta srs2$          | ScSrs2                     | -      | ↓  | -   | -   | ↓   |
|                                       | $\Delta SPAC694.02^*$  | hDDX60, hDDX60L            | -      | ↓↓ | -   | -   | ↓↓↓ |
| 4:<br>HR-<br>associated               | $\Delta chl1$          | hFANCI<br>ScChl1           | -      | ↓  | ↓   | ↓   | ↓   |
|                                       | $\Delta fml1$          | hFANCM<br>ScMph1           | -      | ↓  | ↓↓  | ↓   | ↓   |
|                                       | $\Delta fbh1$          | hFBXO18                    | -      | ↓  | ↓↓  | ↓↓  | ↓   |
|                                       | $\Delta rqh1$          | hWRN, hBLM<br>ScSgs1       | -      | ↓↓ | ↓↓  | ↓↓↓ | ↓↓↓ |
|                                       | $\Delta rad54$         | hRAD54L<br>ScRad54         | ↓      | ↓↓ | ↓↓↓ | ↓↓  | ↓↓↓ |
|                                       | $\Delta rad57$         | hXRCC3<br>ScRad57          | -      | ↓  | ↓↓  | ↓   | ↓↓↓ |
| 5:<br>no<br>phenotype                 | $\Delta hrp3$          | hCHD1, hCHD2<br>ScChd1     | -      | -  | -   | -   | -   |
|                                       | $\Delta fml2$          | hFANCM<br>ScMph1           | -      | -  | -   | -   | -   |
|                                       | $\Delta rrp1$          | hTTF2<br>ScUls1            | -      | -  | -   | -   | -   |
|                                       | $\Delta rrp2$          | hHLTF<br>ScUls1            | -      | -  | -   | -   | -   |
|                                       | $\Delta SPBC3B8.12^*$  | ScIrc3                     | -      | -  | -   | -   | -   |
|                                       | $\Delta SPBC582.10C$   | ScRad16                    | -      | -  | -   | -   | -   |
|                                       | $\Delta rdh54$         | hRAD54B<br>ScRdh54         | -      | -  | -   | -   | -   |
|                                       | $\Delta SPCC737.07c$   | hIGHMBP2<br>ScHcs1         | -      | -  | -   | -   | -   |
|                                       | $\Delta tlh2$          | NA                         | -      | -  | -   | -   | -   |
|                                       | $\Delta SPAC144.05$    | hSHPRH<br>ScIRC20          | -      | -  | -   | -   | -   |
| $\Delta rad55$                        | hRAD51B<br>ScRad55     | -                          | -      | -  | -   | -   |     |

The level of sensitivity is scored by the fitness on the drug plates. No difference from wildtype is labeled as “-”. The level of sickness is scored by number of “↓”. NA = not available. h = Homo sapiens. Sc = *Saccharomyces cerevisiae*. HR = Homologous recombination. # RNA/DNA helicase. \* RNA helicase. SPBC3B8.12 = SPBC11C11.11c.
