# Supplementary material for: Essential Domains ofSchizosaccharomyces pombeRad8 Required for DNA Damage Response
Source: Oxford University Press journal article supplement (doi:10.1534/g3.114.011346), 2014-05-30
Supplement: 011346_tables4.pdf [file 011346_tables4.pdf]

**Table S4 A survey of *rad8* genetic interaction with helicase mutants on different drugs**

|                            | genotype                       | growth         | HU  | MMS            | UV | CPT |
|----------------------------|--------------------------------|----------------|-----|----------------|----|-----|
| no synthetic defects       | <i>Δhrp3 Δrad8</i>             | -              | -   | -              | -  | -   |
|                            | <i>Δtlh2 Δrad8</i>             | -              | -   | -              | -  | -   |
|                            | <i>Δhrp1 Δrad8</i>             | -              | -   | -              | -  | -   |
|                            | <i>Δswr1 Δrad8</i>             | -              | -   | -              | -  | -   |
|                            | <i>Δrdh54 Δrad8</i>            | -              | -   | -              | -  | -   |
|                            | <i>Δrrp1 Δrad8</i>             | -              | -   | -              | -  | -   |
|                            | <i>Δrrp2 Δrad8</i>             | -              | -   | -              | -  | -   |
|                            | <i>ΔSPBC3B8.12 Δrad8</i>       | -              | -   | -              | -  | -   |
|                            | <i>ΔSPBC15C4.05 Δrad8</i>      | -              | -   | -              | -  | -   |
|                            | <i>ΔSPBC582.10C Δrad8</i>      | -              | -   | -              | -  | -   |
|                            | <i>ΔSPAC694.02 Δrad8</i>       | -              | -   | ↑ <sup>§</sup> | -  | -   |
|                            | <i>Δ SPCC737.07c Δrad8</i>     | -              | -   | -              | -  | -   |
|                            | <i>ΔSPAC144.05 Δrad8</i>       | -              | -   | -              | -  | -   |
|                            | <i>cdc21-M68 Δrad8</i>         | -              | -   | -              | -  | -   |
| <i>cdc21-C84 Δrad8</i>     | -                              | -              | -   | -              | -  |     |
| Increased drug sensitivity | <i>Δrhp26 Δrad8</i>            | -              | -   | ↓↓             | -  | -   |
|                            | <i>Δfbh1 Δrad8</i>             | -              | -   | ↓              | ↓  | -   |
|                            | <i>Δrqh1 Δrad8</i>             | -              | ↓   | ↓↓             | ↓  | ND  |
|                            | <i>Δrad54 Δrad8</i>            | ↓              | ↓↓↓ | ↓↓             | ↓  | ↓   |
|                            | <i>Δrad55 Δrad8</i>            | ↓              | ↓   | ↓↓             | ↓↓ | ↓↓  |
|                            | <i>Δrad57 Δrad8</i>            | -              | ↓   | ↓↓             | ↓  | ↓   |
|                            | <i>pfh1-R20 Δrad8</i>          | -              | ↑   | ↓              | -  | -   |
|                            | <i>dna2-K961T Δrad8</i>        | -              | ↓   | ↓↓             | ↓  | ND  |
|                            | <i>dna2<sup>ts</sup> Δrad8</i> | -              | -   | ↓              | ↓  | -   |
|                            | <i>Δfml1 Δrad8</i>             | -              | ↓↓  | ↓↓             | ↓↓ | ↓↓  |
| <i>Δfml2 Δrad8</i>         | -                              | -              | ↓   | -              | -  |     |
| mixed drug sensitivity     | <i>Δfml1 Δfml2 Δrad8</i>       | -<br>elongated | ↓↓  | ↓↓↓            | ↓↓ | ↑   |
|                            | <i>Δchl1 Δrad8</i>             | -              | -   | ↓↓             | -  | ↑   |
|                            | <i>Δsrs2 Δrad8</i>             | -              | ↑   | ↓              | -  | ↓↓  |
|                            | <i>Δsnf22 Δrad8</i>            | -              | ↑   | -              | -  | ↓   |

The level of sensitivity is scored by the fitness on the drug plates. No difference from the either of the single mutants is labeled as “-”. The level of increased drug sensitivity is scored by number of “↓”. The level of reduced drug sensitivity is scored by number of “↑”. ND = not determined. <sup>§</sup> one RNA helicase partially decreased the MMS sensitivity of *rad8*. SPBC3B8.12 = SPBC11C11.11c.
